# Supplementary material for: Steric minimization towards high planarity and molecular weight for aggregation and photovoltaic studies
Source: Royal Society of Chemistry journal article supplement (doi:10.1039/c5ta07432k), 2015-01-01
Supplement: c5ta07432k1.pdf [file c5ta07432k1.pdf]

## Electronic Supplementary Information

For

### Steric Minimization Towards High Planarity and Molecular Weight for Aggregation and Photovoltaic Studies

Liangliang Han,<sup>a</sup> Tong Hu,<sup>b</sup> Xichang Bao,<sup>a</sup> Meng Qiu,<sup>a</sup> Wenfei Shen,<sup>a</sup> Mingliang Sun,<sup>b</sup> Weichao Chen,<sup>a\*</sup> and Renqiang Yang<sup>a,c\*</sup>

- <sup>a</sup> CAS Key Laboratory of Bio-based Materials, Qingdao Institute of Bioenergy and Bioprocess Technology, Chinese Academy of Sciences, Qingdao 266101, China.  
E-mails: [chenwc@qibebt.ac.cn](mailto:chenwc@qibebt.ac.cn) (W. Chen), [yangrq@qibebt.ac.cn](mailto:yangrq@qibebt.ac.cn) (R. Yang)
- <sup>b</sup> Institute of Material Science and Engineering, Ocean University of China, Qingdao 266100, China.
- <sup>c</sup> State Key Laboratory of Luminescent Materials and Devices, South China University of Technology, Guangzhou 510641, China

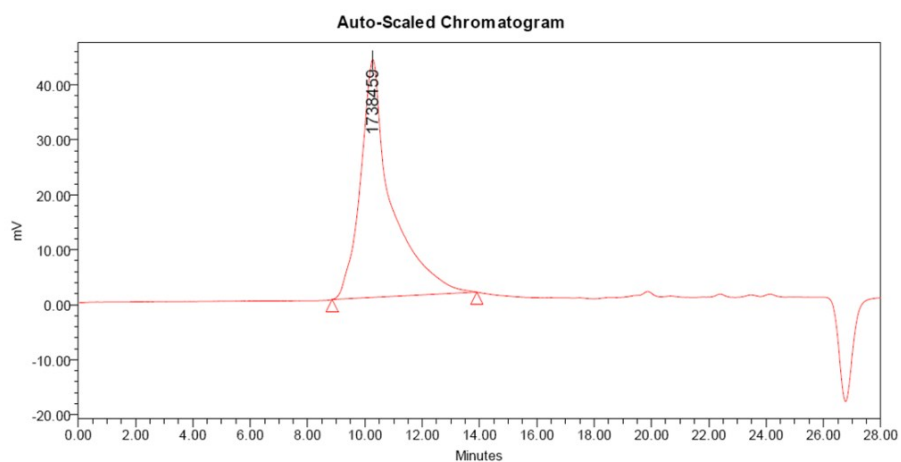

**GPC Results**

| Dist Name | Mn     | Mw     | Mv | MP      | Mz      | Mz+1    | Poly dispersity | K | alpha |
|-----------|--------|--------|----|---------|---------|---------|-----------------|---|-------|
| 1         | 343374 | 819653 |    | 1738459 | 1244697 | 1474694 | 2.387051        |   |       |

**Fig. S1** GPC chromatogram of **PTOBDTDTffBT**, chloroform as an eluent at a column temperature of 25 °C.

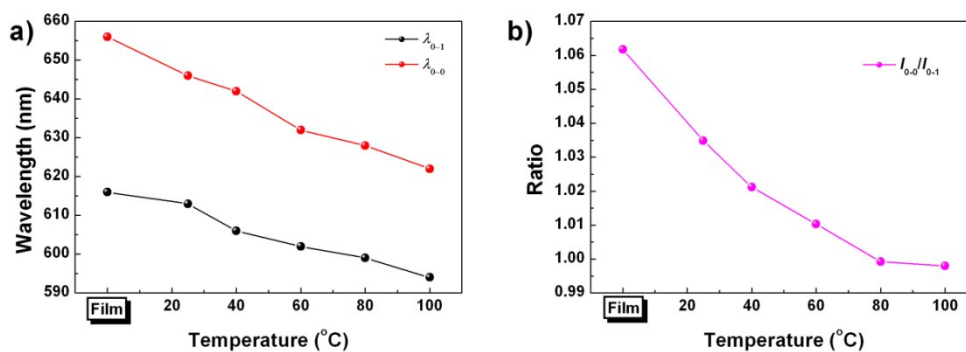

**Fig. S2**  $\lambda_{0-0}$  and  $\lambda_{0-1}$  displacement (a), intensity ratio value of  $\lambda_{0-0}$  and  $\lambda_{0-1}$  (b) of **PTOBDTDTffBT** in *o*-DCB solution at different temperature and in its neat film state.

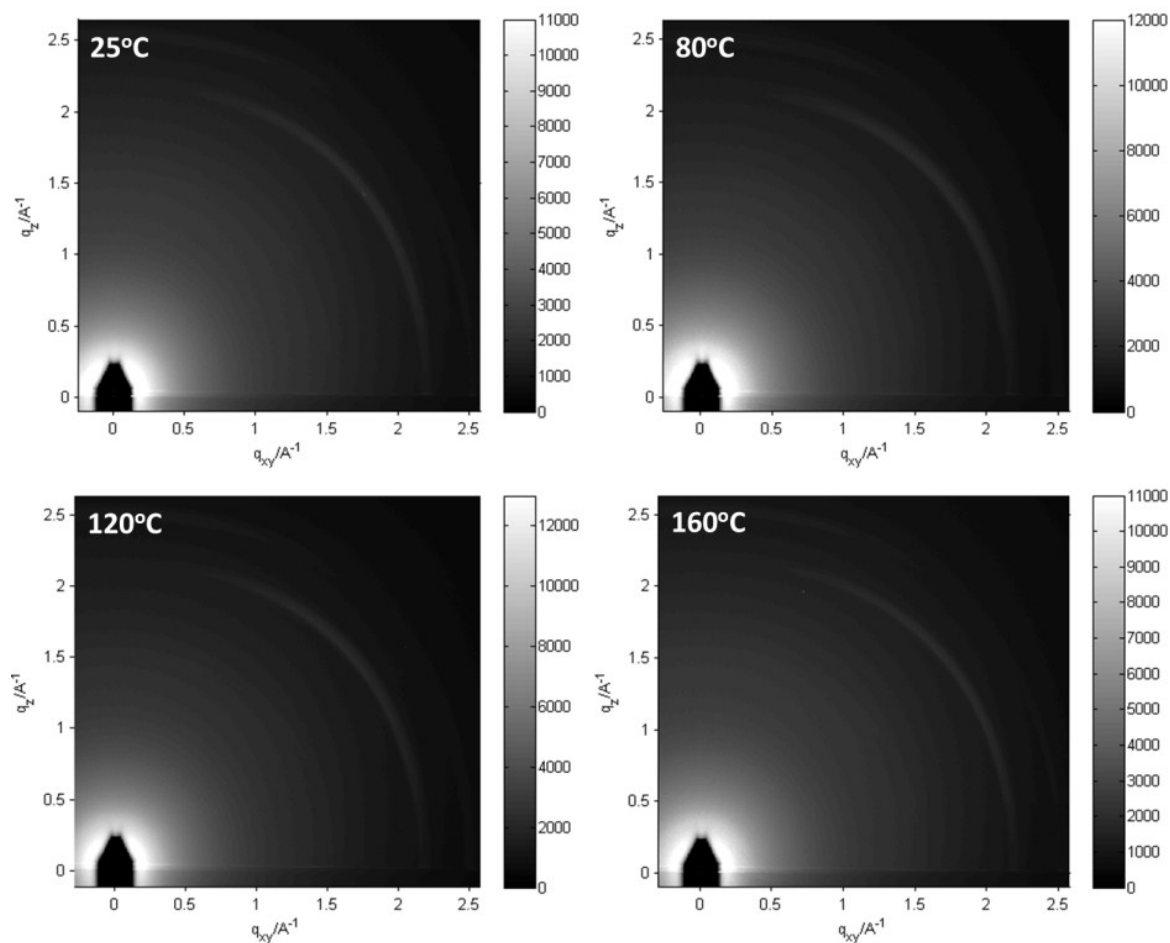

**Fig. S3** 2D GIXD patterns of PTOBDTDTffBT films spin-coated from *o*-DCB solution at 25 °C, 80 °C, 120 °C and 160 °C.

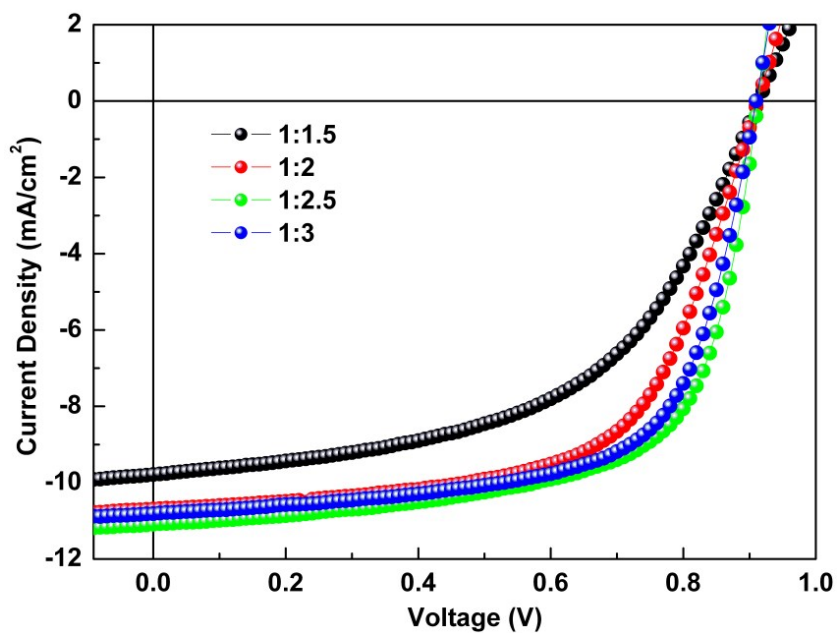

**Fig. S4**  $J$ - $V$  curves of PTOBDTDTffBT/PC<sub>71</sub>BM based devices with different donor/acceptor ratios.

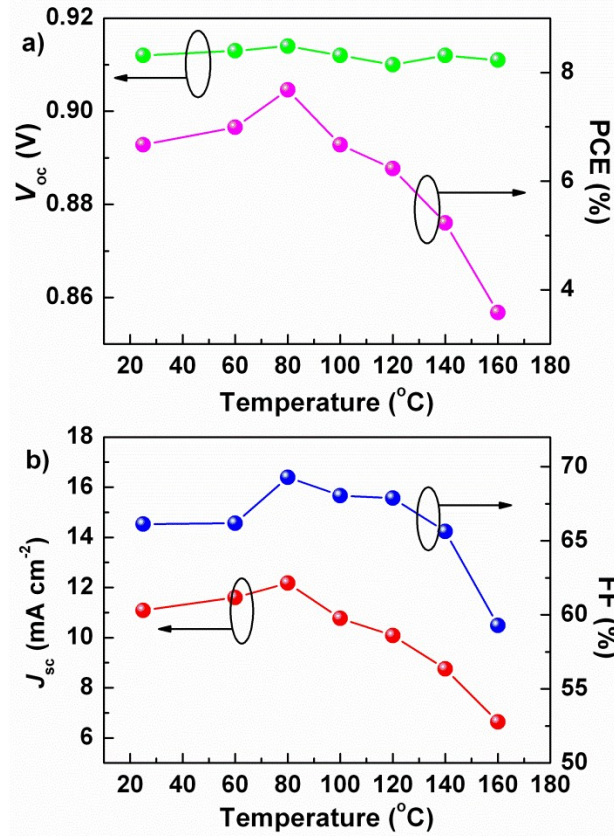

**Fig. S5**  $V_{oc}$  (a), PCE (a),  $J_{sc}$  (b) and FF (b) changes of the active layer spin coated at different temperature from 25 °C to 160 °C.

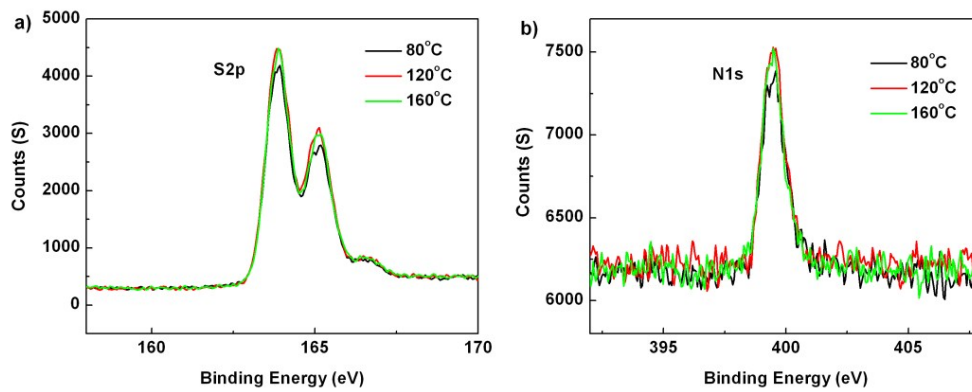

**Fig. S6** XPS spectra of S2p (a) and N1s (b) in the **PTOBDDTffBT/PC<sub>71</sub>BM** surface spin coated at 80 °C, 120 °C and 160 °C.

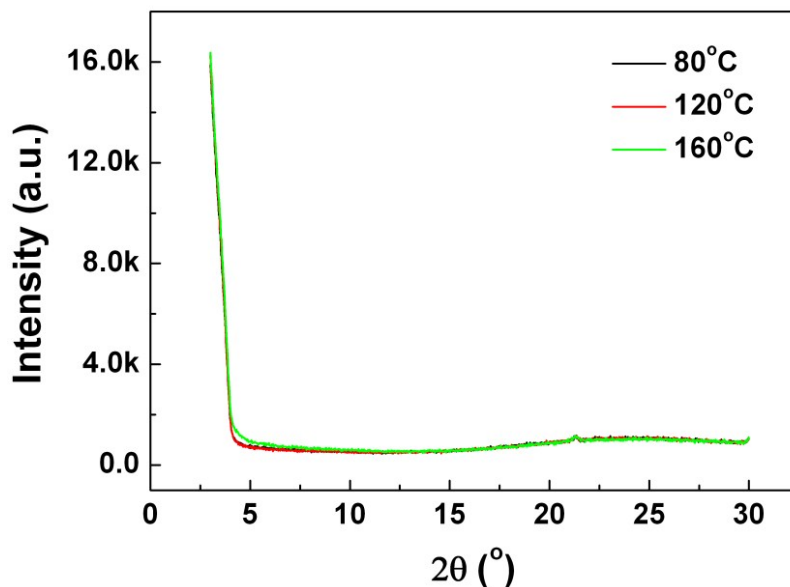

**Fig. S7** XRD patterns of PTOBDTDTTffBT/PC<sub>71</sub>BM blends spin-coated from *o*-DCB solution at 80 °C, 120 °C and 160 °C.

**Table S1.** Summary of the peak wavelength and the intensity of  $\lambda_{0-0}$  and  $\lambda_{0-1}$ .

| Temperatur<br>e  | $\lambda_{0-1}$ | $\lambda_{0-0}$ | $I_{0-1}$ | $I_{0-0}$ | $I_{0-0}/I_{0-1}$ |
|------------------|-----------------|-----------------|-----------|-----------|-------------------|
| 25 <sup>a</sup>  | 616             | 656             | 1.03607   | 1.1       | 1.0617            |
| 25 <sup>b</sup>  | 613             | 646             | 0.96632   | 1         | 1.0349            |
| 40 <sup>b</sup>  | 606             | 642             | 0.88128   | 0.9       | 1.0212            |
| 60 <sup>b</sup>  | 602             | 632             | 0.79185   | 0.8       | 1.0103            |
| 80 <sup>b</sup>  | 599             | 628             | 0.69845   | 0.69788   | 0.9992            |
| 100 <sup>b</sup> | 594             | 622             | 0.59945   | 0.59826   | 0.9980            |

<sup>a</sup> Film. <sup>b</sup> Solution.

**Table S2.** Summary of device parameters based on the active layers with different polymer/PC<sub>71</sub>BM ratios spun cast from *o*-DCB solutions at 25 °C.

| Polymer/PC <sub>71</sub> BM ratio | Thickness [nm] | $V_{oc}$ [V] | $J_{sc}$ [mA cm <sup>-2</sup> ] | FF [%] | PCE <sup>a</sup> [%] |
|-----------------------------------|----------------|--------------|---------------------------------|--------|----------------------|
| 1:1.5                             | 110            | 0.91         | 9.74                            | 52.99  | 4.69 (4.38)          |
| 1:2                               | 109            | 0.91         | 10.67                           | 61.97  | 6.02 (5.73)          |
| 1:2.5                             | 108            | 0.91         | 11.09                           | 66.12  | 6.67 (6.39)          |
| 1:3                               | 108            | 0.91         | 10.82                           | 65.85  | 6.48 (6.20)          |

<sup>a</sup> Average PCE in brackets (at least 10 devices).
